# Supplementary material for: IL‐6 Deficiency Attenuates Skeletal Muscle Atrophy by Inhibiting Mitochondrial ROS Production through the Upregulation of PGC‐1α in Septic Mice
Source: Hindawi journal article supplement (doi:10.1155/2022/9148246), 2022-01-01

Con

shNC

shRNA1

shRNA2

shRNA3

PGC-1 $\alpha$

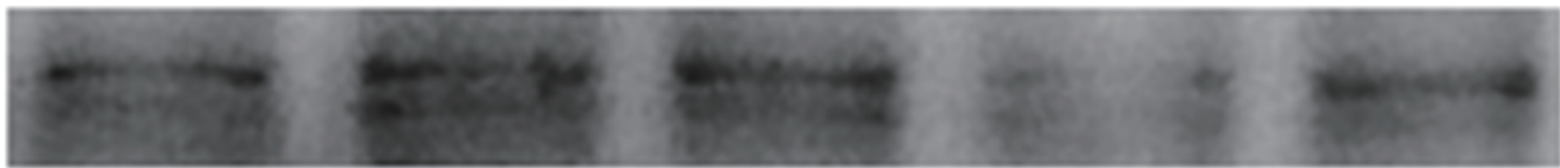

$\alpha$ -tubulin

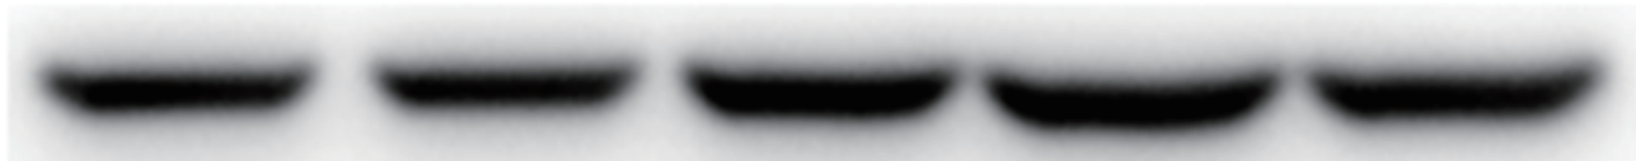

Supplement: f1 [file 9148246.f1.pdf]
